# Supplementary material for: Treatment with Autophagy Inducer Trehalose Alleviates Memory and Behavioral Impairments and Neuroinflammatory Brain Processes in db/db Mice
Source: MDPI journal article supplement (doi:10.3390/cells10102557), 2021-09-27

Article

# Treatment with Autophagy Inducer Trehalose Alleviates Memory and Behavioral Impairments and Neuroinflammatory Brain Processes in db/db Mice

Tatiana A. Korolenko <sup>1\*</sup>, Nina I. Dubrovina <sup>1</sup>, Marina V. Ovsyukova <sup>1</sup>, Nataliya P. Bgatova <sup>2</sup>, Michael V. Tenditnik <sup>1</sup>, Alexander B. Pupyshev <sup>1</sup>, Anna A. Akopyan <sup>1</sup>, Natalya V. Goncharova <sup>1</sup>, Chih-Li Lin <sup>3</sup>, Evgeny L. Zavjalov <sup>4</sup>, Maria A. Tikhonova <sup>1</sup> and Tamara G. Amstislavskaya <sup>1</sup>

**Figure S1.** Scheme of the experiment.

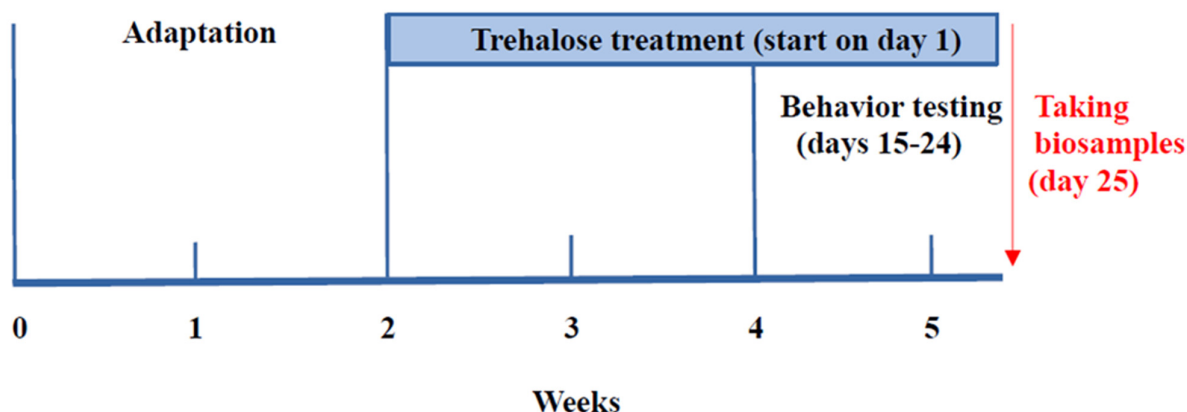

Supplement: s1 [file s1]
